# Supplementary figures and images for: Insight into tubulin regulation from a complex with colchicine and a stathmin-like domain
Source: Springer Nature journal article supplement (doi:10.1038/nature02393), 2004-03-01

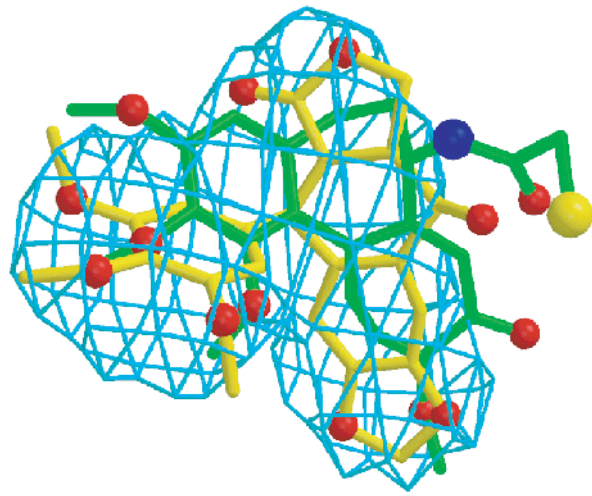

Knossow\_Figsup2

Supplement: 41586_2004_BFnature02393_MOESM3_ESM.pdf [file 41586_2004_BFnature02393_MOESM3_ESM.pdf]
